# Supplementary material for: The pneumococcal social network
Source: PLoS Pathog. 2020 Oct 29;16(10):e1008931. doi: 10.1371/journal.ppat.1008931 (PMC7595303; doi:10.1371/journal.ppat.1008931)
Supplement: S1 Table — (XLSX) [file ppat.1008931.s001.xlsx]

## Sheet: Sheet1
Table S1: Protein sequences of the pneumococcal peptides described in this article
S.No.	Peptide	Number	Sequence*
1	CSP	SP_2237	MKNTVKLEQFVALKEKDLQKIKGGEMRISRIILDFLFLRKK
2	CibA	SP_0125	MTNFDILDNQFLSLSENELSDIDGGLAPLVIFGVAVSWKAIAGGTALIGSGLAAGYFLGGD
3	CibB	SP_0124	MMKDLNNYREISNKELQEIKGGFGVGVGIALFMAGYTIGKDLRKKFGKSC
4	BriC	SP_0429	MTGTNTFTVLSTEDLEQTSGGLAVWEDGYSRWLYYREFAPYMRQGALNSYIDAWKYGFRAG
5	BIP	SP_0528	MDKKQNLTSFQELTTTELNQITGGGLWEDLLYNINRYAHYIT
6	BlpM	SP_0539	MDTKIMEQFHEMDITMLSSIEGGKNNWQTNVLEGGGAAFGGWGLGTAICAASGVGAPFMGACGYIGAKFGVDLWAGVTGATGGF
7	BlpN	SP_0540	MNTYCNINETMLSEVYGGNSGGAAVVAALGCAAGGVKYGRLLGPWGAAIGGIGGAVVCGYLAYTATS
8	BlpI	SP_0531	MNTKMMEQFSVMDNEELEIVSGGRGNLGSAIGGCIGAVLLAAATGPITGGAATLICVGSGIMSSL
9	BlpJ	SP_0532	MNTKMLSQLEVMDTEMLAKVEGGYSSTDCQNALITGVTTGIITGGTGAGLATLGVAGLAGAFVGAHIGAIGGGLTCLGGMVGDKLGLSW
10	BlpKin#	SP_0533	MDTKMMSQFSVMDTEMLACVEGGGCNWGDFAKAGVGGGAARGLQLGIKTGTWQGAATGAAGGAILGGVAYAATCWW
11	BlpKout#	SP_0041	MNTKTMSQFEIMDTEMLACVEGGGCNWGDFAKAGVGGGAARGLQLGIKTRTWQGAATGAVGGAILGGVAYAATCWW
12	VP1	SP_0142	MLNLQFAETMELTEAELQDVRGGNLVNSMGGGGRSGISGWGVPGIYPGWGNQGMSPNRGAFDWTIDLADGLFGRRRR
13	RtgG	CGSSp9BS68_07272	MELILPNNYVDLEQEEMMYLDGGEPMSISAIVALAITIGGASYSTGYVLGERVYYSGYKNSDYQKNKWGIRGAMLAAFGAIGAVVMLGFENRYYALVTGRG
14	RtgC	SP_0115	MELVLPNNYVALEQEEMMYLDGGGVGRNWWNSRGSFATVLDVDLAIYSGGATIYSAYAIKKAISANRGAITRTLRSLIIKHVGSAAGHLVNTALNVALTVTGFSLGGAIAYGADWADGSLDGYIFA
15	RtgT	CGSSp9BS68_02658	MELVLPNNYVVLEQEEMMYLDGGFSIPRWPVATAINIAFNGVLGGGAISLVRNYIRNYGLRRVTSAIAGAAARYVGVRVANRVAGFALPAINGFAAWMSIGDAITTIWANNDVNRRDPNLNALW
16	RtgW	CGSSp9BS68_07277	MELVLPNNYVALEQEEMMYLDGGAYLSKRACQGICAALAMSPGTFIALAGAAVLTKKLINYIKVGGLGGWLIGAAAGVLAGAAGRIAYCIGYGALNRGCDISGNPYPWDGFISATVR
17	SHP144	Adjacent to SPD_0144	MKKRKIQLILLLISEWVIVIPFLTNL
18	SHP939	Adjacent to SPD_0939	MKKISKFLPILFLVMDIIIIVGG
19	RtgSA	Adjacent to CGSSp9BS68_07247	MNKKIFCILVCIISLISLAIIFPWGWPI
20	SHP1518	Adjacent to SPD_1518	MGFKKYLKNLPKNSGFLIWSWIQLIWFETWFWG
21	PhrA	SP_1947	MRKKRGIKKLVTFALLGVFMFSNTIPYQQFIQKNKQLEIRVQSQKKSNGLDVGKAD
22	PhrA2	SPN23F_12740	MSILAKFRKIIFMLSFLGLFGSGFFFKEPVNQSQYTWESRIIQQAVTTNEVDLGLAD
23	LanA1	SP_1948	MTNFNSNEKFCGKSLKSLSADEMSLIYGASDGAEPRWTPTPIILKSAAASSKVCISAAVSGIGGLVSYNNDCLG
24	LanA2	SP_1949	MKNDFVIGKSLKELSLEEMQLVYGGTDGADPRSTIICSATLSFIASYLGSAQTRCGKDNKKK
25	LcpA	SPN23F_12701	MSDWKKPIYESLSTEGNPAGDILRELSDSEMDQAMAGGTARSYCACYSGEHSCGRGCTITTECPFLTFICC
26	PldA1	Locus downstream of the SPN23F_12760 homolog in P174	MAKNTSRPEIDSLSFEVENQELSGKSGAGWFTAVQLTLAGRCGRWFTGSFECTTNNVKCG
27	PldA2	Locus downstream of the SPN23F_12760 homolog in P174	MRKNNNHKEIDTLDFEVKNQELSGKSGSGWFTAVQLTLAGRCGRWFTGSYECTSNNVKCG
28	PldA3	Locus downstream of the SPN23F_12760 homolog in P174	MKSKKVNTEIDTLEFEIDNQELNGTSGSGWWYTAFKMTLAGRCGLCFTCSYECTTNNVHC
29	PldA4	Locus downstream of the SPN23F_12760 homolog in P174	MKQDNFEIDSLDYEINSQELNGKSAAGWYTAVRLTVQGRCGWWFTHSYECTSPNVRCG
*There may be different allelic variants and pherotypes for each peptide. These sequences correspond to the strain referenced in this table in Column 3.
#BlpKin refers to the allele present within the Blp locus and BlpKout (previously BlpU) refers to the allele present outside the locus near ComAB.
